# Supplementary material for: Using ‘amenable mortality’ as indicator of healthcare effectiveness in international comparisons: results of a validation study
Source: HighWire-hosted journal article supplement (doi:10.1136/jech-2012-201471), 2012-09-25
Supplement: jech-2012-201471-s1.pdf [file jech-2012-201471-s1.pdf]

## ***Appendix A: References indicating the timing of introduction of medical innovations***

### **HIV/Aids: Antiretroviral drugs**

United Kingdom (60)  
The Netherlands (61)  
Germany (62)  
France (34)  
Spain (63)  
Estonia (64)  
Sweden (65)

### **Breast cancer: Tamoxifen**

United Kingdom (66)  
The Netherlands (67)  
Germany (68)  
France (69)  
Spain (70)  
Estonia (64)  
Sweden (71)

### **Breast cancer: Screening by mammography**

United Kingdom (72)  
The Netherlands (73)  
Germany (74)  
France (75)  
Spain (76)  
Estonia (77)  
Sweden (78)

### **Hodgkin's disease: High dose therapy and peripheral blood stem cell transplantation**

United Kingdom  
The Netherlands (80)  
Germany (81)  
France (82)  
Spain (83)  
Estonia (84)  
Sweden (35)

### **Cerebrovascular disease: Prevention with antihypertensives**

United Kingdom (85)  
The Netherlands (86)  
Germany (87)  
France (88)  
Spain (89)  
Estonia (90)  
Sweden (91)

**Cerebrovascular disease: Intensive management of stroke**

United Kingdom (92)

The Netherlands(93)

Germany (94)

France (95)

Spain (96)

Estonia (97)

Sweden (98)
